# Supplementary material for: Kinetics and mechanistic investigation into the possible activation of imidazolium trans-[tetrachloridodimethylsulfoxideimidazoleruthenate(iii)], NAMI-A, by 2-mercaptoethane sulfonate
Source: Royal Society of Chemistry journal article supplement (doi:10.1039/c4dt01643b), 2014-01-01
Supplement: c4dt01643b1.pdf [file c4dt01643b1.pdf]

# Kinetics and Mechanistic Investigation into the Possible Activation of Imidazolium *trans*-tetrachloro(dimethyl sulfoxide)imidazole- ruthenate(III), NAMI-A, by 2-Mercaptoethane sulfonate

## Supplementary Information.

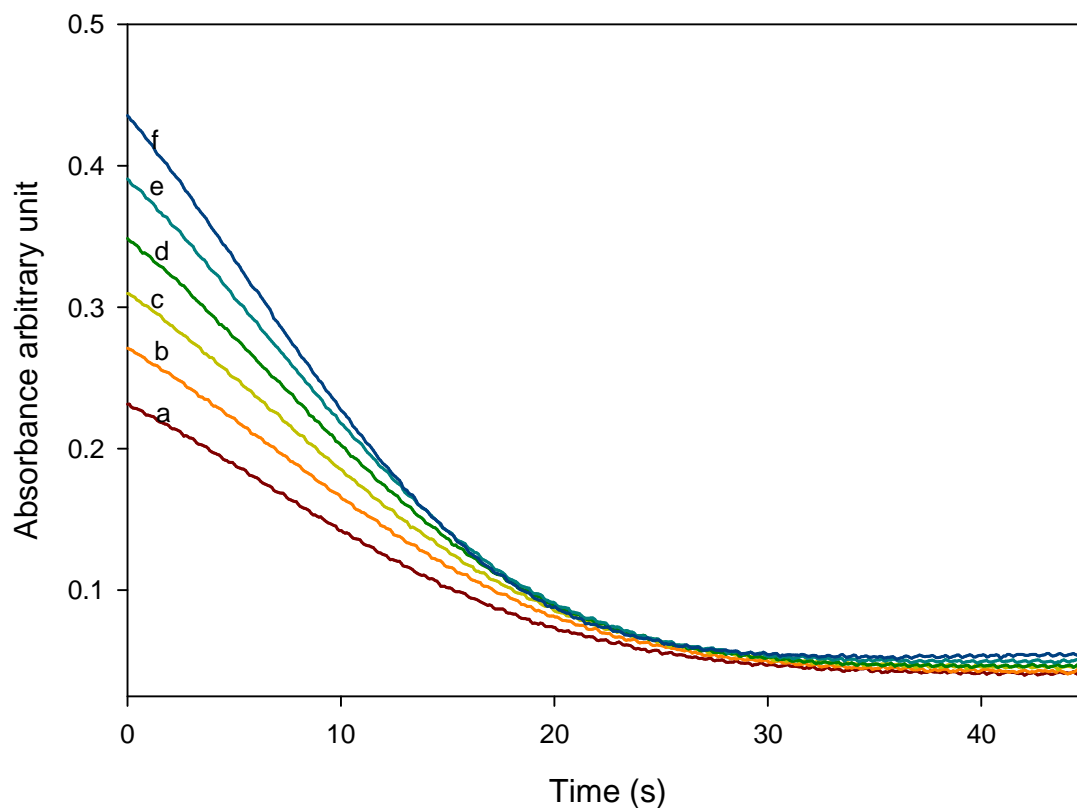

**Figure S1:** Kinetic traces of reaction in 0.1 M phosphate buffer (pH 7.4) showing dependence on [NAMI-A] at its  $\lambda_{\max}$ .  $[\text{MESNA}]_0 = 5.0 \times 10^{-2} \text{ M}$ ;  $[\text{NAMI-A}]_0 =$  (a)  $5.0 \times 10^{-5} \text{ M}$  (b)  $6.0 \times 10^{-5} \text{ M}$  (c)  $7.0 \times 10^{-5} \text{ M}$  (d)  $6.0 \times 10^{-5} \text{ M}$  (e)  $9.0 \times 10^{-5} \text{ M}$  (f)  $1.0 \times 10^{-4} \text{ M}$

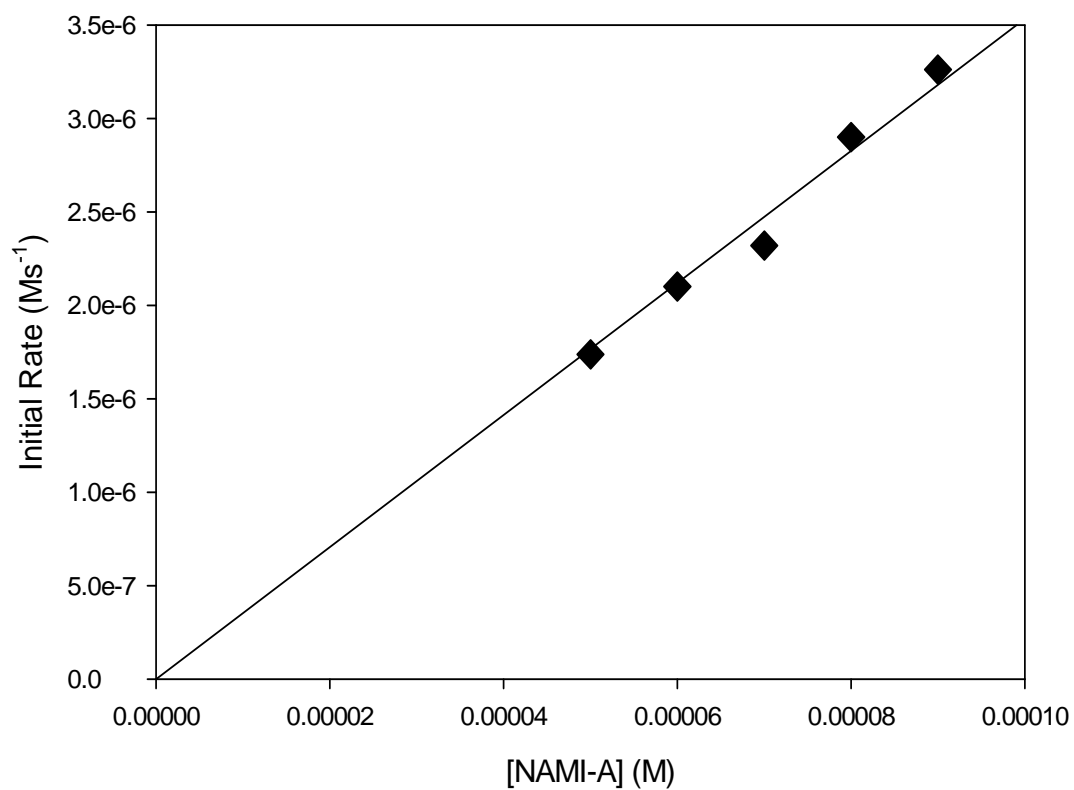

**Figure S2:** Initial rate plot derived from Figure 3a, showing linear dependence on NAMI-A.  $[\text{MESNA}]_0 = 2.0 \times 10^{-3} \text{ M}$ ;  $[\text{NAMI-A}]_0 = 3.0 \times 10^{-5} \text{ M}$  to  $9.0 \times 10^{-5} \text{ M}$

### Effect of NAMI-A variation at pH 6.0 using 0.1M acetate buffer

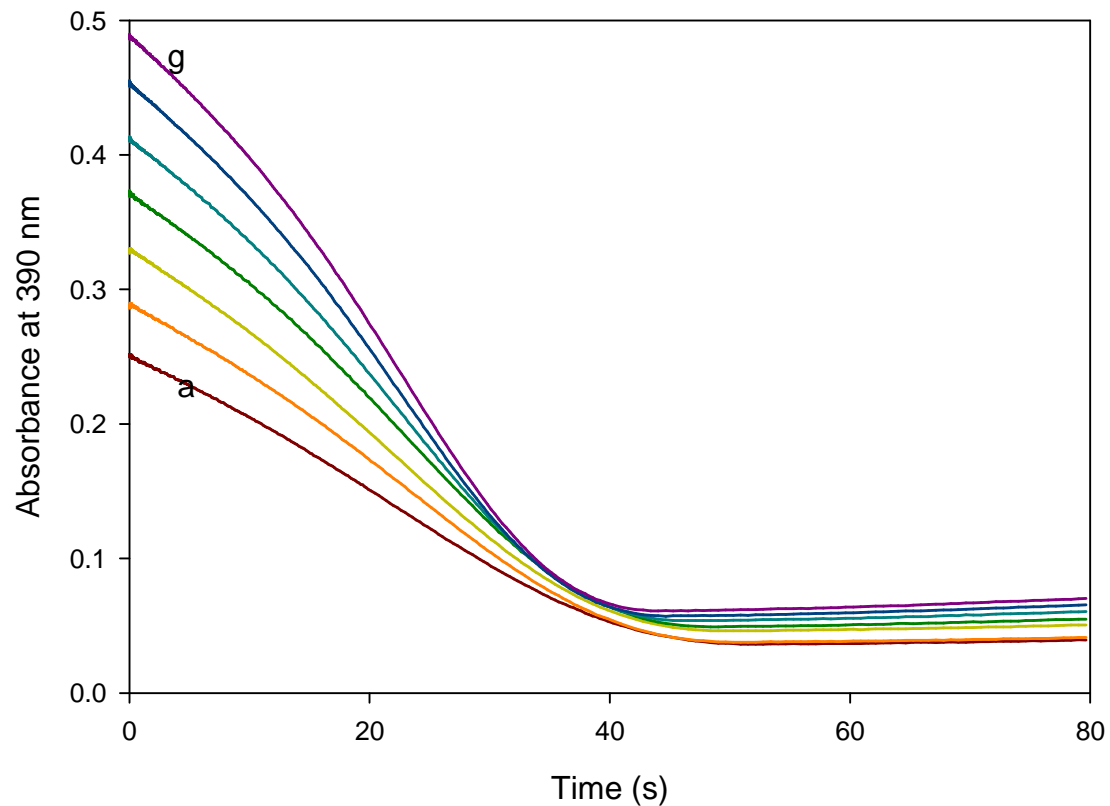

**Figure S3:** Kinetic traces of reaction in 0.1 M acetate buffer (pH 6.0) showing dependence on [NAMI-A] at its  $\lambda_{\max}$ . [MESNA]<sub>o</sub> =  $5.0 \times 10^{-2}$  M; [NAMI-A]<sub>o</sub> = (a)  $5.0 \times 10^{-5}$  M (b)  $6.0 \times 10^{-5}$  M (c)  $7.0 \times 10^{-5}$  M (d)  $6.0 \times 10^{-5}$  M (e)  $9.0 \times 10^{-5}$  M (f)  $1.0 \times 10^{-4}$  M (g)  $1.1 \times 10^{-4}$  M

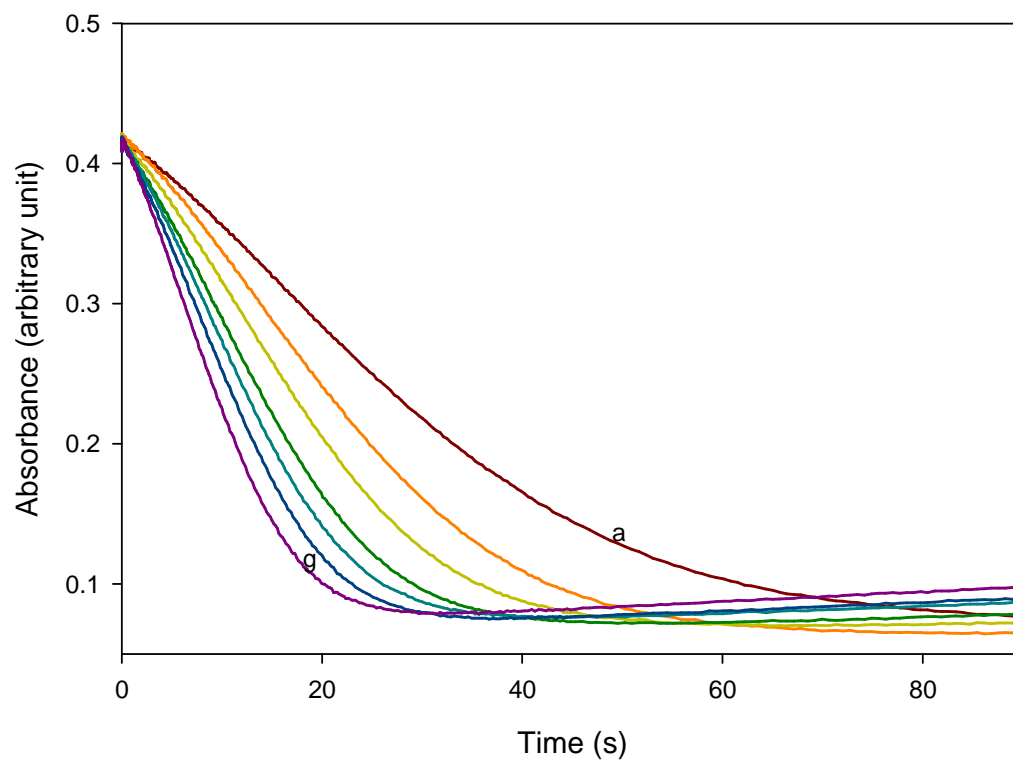

**Figure S4:** Effect of MESNA variation on the consumption of NAMI-A at 390 nm (pH 7.4, 0.1 M phosphate buffer).  $[NAMI-A]_0 = 1.0 \times 10^{-4}$  M;  $[MESNA]_0 =$  (a)  $1.0 \times 10^{-2}$  M (b)  $2.0 \times 10^{-2}$  M (c)  $3.0 \times 10^{-2}$  M (d)  $4.0 \times 10^{-2}$  M (e)  $5.0 \times 10^{-2}$  M (f)  $6.0 \times 10^{-2}$  M (g)  $7.0 \times 10^{-2}$  M. Reaction rate increased with NAMI-A increase.

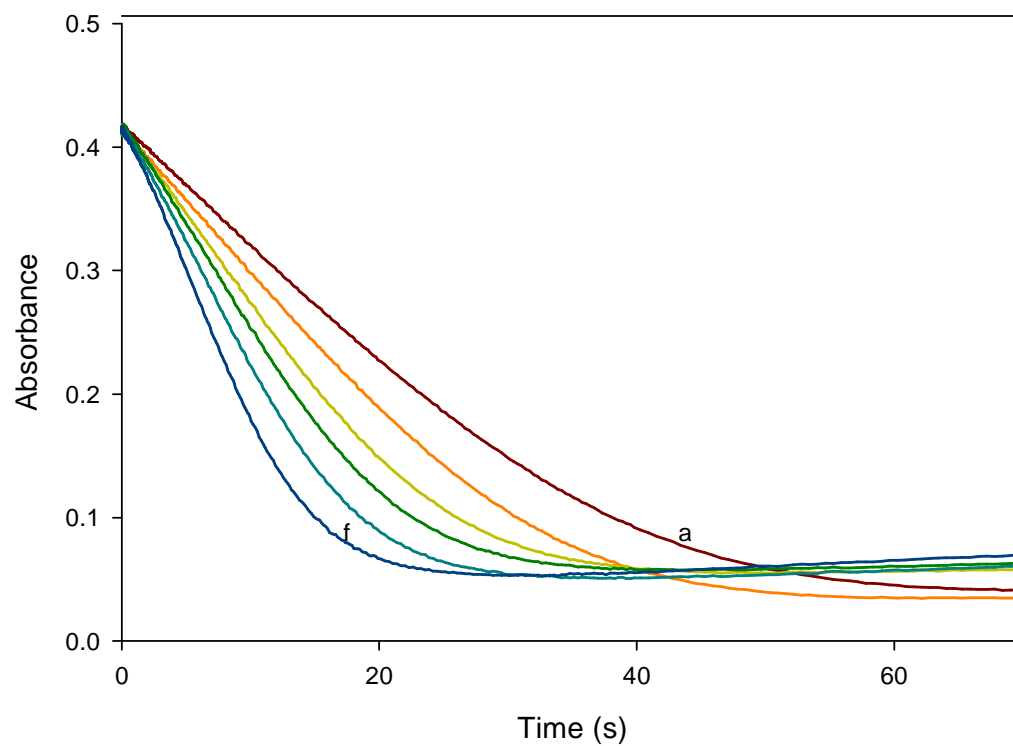

**Figure S5:** Temperature dependence of NAMI-A-MESNA reaction (0.1 M phosphate buffer, pH 7.4). Reaction rate increased with temperature increase.  $[\text{MESNA}]_0 = 5.0 \times 10^{-2} \text{ M}$ ;  $[\text{NAMI-A}]_0 = 5.0 \times 10^{-2} \text{ M}$ ; Temp = (a) 10 °C (b) 15 °C (c) 20 °C (d) 25 °C (e) 30 °C (f) 37 °C.
